# Supplementary material for: Airborne and Underwater Noise Produced by a Hovercraft in the North Caspian Region: Pressure and Particle Motion Measurements
Source: MDPI journal article supplement (doi:10.3390/jmse11051079), 2023-05-19
Supplement: s1 [file s1]

Archive with 1 entries (1 files):
- jmse-2382445-supplementary.pdf
